# Supplementary material for: Core Genome Sequencing Analysis of E. coli O157:H7 Unravelling Genetic Relatedness among Strains from Cattle, Beef, and Humans in Bishoftu, Ethiopia
Source: MDPI journal article supplement (doi:10.3390/microbiolres14010013), 2023-01-25
Supplement: s1 [file s1]

**Table S4.** Whole-genome sequencing (WGS)-based virulence-associated gene profiles for all E. coli isolates included in our study, with indication of the core genome multilocus sequence typing (cgMLST) clusters and pathotype

| Isolate ID | CgMLST cluster | Pathotype | Virulence genes      |                     |             |             |                        |             |            |                                |                                                             |
|------------|----------------|-----------|----------------------|---------------------|-------------|-------------|------------------------|-------------|------------|--------------------------------|-------------------------------------------------------------|
|            |                |           | Adherence            | Complement protease | Invasion    | Iron uptake | Proteases              | Regulation  | Survival   | Toxins                         | Type III translocated proteins                              |
| MF3R       | 1              | aEPEC     | <i>eae, iha, tir</i> | <i>traT</i>         | <i>ompT</i> | <i>chuA</i> | <i>espP, gad, katP</i> | <i>terC</i> | <i>iss</i> | <i>astA, ehxA, toxB</i>        | <i>espA, espB, espF, espJ, etpD, nleA, nleB, nleC, tccP</i> |
| MF4HI      | 1              | aEPEC     | <i>eae, iha, tir</i> | <i>traT</i>         | <i>ompT</i> | <i>chuA</i> | <i>espP, gad, katP</i> | <i>terC</i> | <i>iss</i> | <i>astA, ehxA, toxB</i>        | <i>espA, espB, espF, espJ, etpD, nleA, nleB, nleC, tccP</i> |
| EF115      | 1              | aEPEC     | <i>eae, iha, tir</i> | <i>traT</i>         | <i>ompT</i> | <i>chuA</i> | <i>espP, gad, katP</i> | <i>terC</i> | <i>iss</i> | <i>astA, ehxA, toxB</i>        | <i>espA, espB, espF, espJ, etpD, nleA, nleB, nleC, tccP</i> |
| EF3        | 1              | aEPEC     | <i>eae, iha, tir</i> | <i>traT</i>         | <i>ompT</i> | <i>chuA</i> | <i>espP, gad, katP</i> | <i>terC</i> | <i>iss</i> | <i>astA, ehxA, toxB</i>        | <i>espA, espB, espF, espJ, etpD, nleA, nleB, nleC, tccP</i> |
| EF40       | 1              | aEPEC     | <i>eae, iha, tir</i> | <i>traT</i>         | <i>ompT</i> | <i>chuA</i> | <i>espP, gad, katP</i> | <i>terC</i> | <i>iss</i> | <i>astA, ehxA, toxB</i>        | <i>espA, espB, espF, espJ, etpD, nleA, nleB, nleC, tccP</i> |
| EF70       | 1              | STEC      | <i>eae, iha, tir</i> | <i>traT</i>         | <i>ompT</i> | <i>chuA</i> | <i>espP, gad, katP</i> | <i>terC</i> | <i>iss</i> | <i>astA, ehxA, stx2c, toxB</i> | <i>espA, espB, espF, espJ, etpD, nleA, nleB, nleC, tccP</i> |
| EM68       | 1              | aEPEC     | <i>eae, iha, tir</i> | <i>traT</i>         | <i>ompT</i> | <i>chuA</i> | <i>espP, gad, katP</i> | <i>terC</i> | <i>iss</i> | <i>astA, ehxA, toxB</i>        | <i>espA, espB, espF, espJ, etpD, nleA, nleB, nleC, tccP</i> |
| EM86       | 1              | STEC      | <i>eae, iha, tir</i> | <i>traT</i>         | <i>ompT</i> | <i>chuA</i> | <i>espP, gad, katP</i> | <i>terC</i> | <i>iss</i> | <i>astA, ehxA, stx2c, toxB</i> | <i>espA, espB, espF, espJ, etpD, nleA, nleB, nleC, tccP</i> |
| ES107      | 1              | aEPEC     | <i>eae, iha, tir</i> | <i>traT</i>         | <i>ompT</i> | <i>chuA</i> | <i>espP, gad, katP</i> | <i>terC</i> | <i>iss</i> | <i>astA, ehxA, toxB</i>        | <i>espA, espB, espF, espJ, etpD, nleA, nleB, nleC, tccP</i> |
| ES18       | 1              | STEC      | <i>eae, iha, tir</i> | <i>traT</i>         | <i>ompT</i> | <i>chuA</i> | <i>espP, gad, katP</i> | <i>terC</i> | <i>iss</i> | <i>astA, ehxA, stx2c, toxB</i> | <i>espA, espB, espF, espJ, etpD, nleA, nleB, nleC, tccP</i> |
| ES91       | 1              | aEPEC     | <i>eae, iha, tir</i> | <i>traT</i>         | <i>ompT</i> | <i>chuA</i> | <i>espP, gad, katP</i> | <i>terC</i> | <i>iss</i> | <i>astA, ehxA, toxB</i>        | <i>espA, espB, espF, espJ, etpD, nleA, nleB, nleC, tccP</i> |
| EF114      | 2              | STEC      | <i>eae, iha, tir</i> | <i>traT</i>         | <i>ompT</i> | <i>chuA</i> | <i>espP, gad, katP</i> | <i>terC</i> | <i>iss</i> | <i>astA, ehxA, stx2c, toxB</i> | <i>espA, espB, espF, espJ, etpD, nleA, nleB, nleC, tccP</i> |
| EF123      | 2              | STEC      | <i>eae, iha, tir</i> | <i>traT</i>         | <i>ompT</i> | <i>chuA</i> | <i>espP, gad, katP</i> | <i>terC</i> | <i>iss</i> | <i>astA, ehxA, stx2c, toxB</i> | <i>espA, espB, espF, espJ, etpD, nleA, nleB, nleC, tccP</i> |
| EF22       | 2              | STEC      | <i>eae, iha, tir</i> | <i>traT</i>         | <i>ompT</i> | <i>chuA</i> | <i>espP, gad, katP</i> | <i>terC</i> | <i>iss</i> | <i>astA, ehxA, stx2c, toxB</i> | <i>espA, espB, espF, espJ, etpD, nleA, nleB, nleC, tccP</i> |
| EF24       | 2              | STEC      | <i>eae, iha, tir</i> | <i>traT</i>         | <i>ompT</i> | <i>chuA</i> | <i>espP, gad, katP</i> | <i>terC</i> | <i>iss</i> | <i>astA, ehxA, stx2c, toxB</i> | <i>espA, espB, espF, espJ, etpD, nleA, nleB, nleC, tccP</i> |
| EF25       | 2              | STEC      | <i>eae, iha, tir</i> | <i>traT</i>         | <i>ompT</i> | <i>chuA</i> | <i>espP, gad, katP</i> | <i>terC</i> | <i>iss</i> | <i>astA, ehxA, stx2c, toxB</i> | <i>espA, espB, espF, espJ, etpD, nleA, nleB, nleC, tccP</i> |
| EF42       | 2              | STEC      | <i>eae, iha, tir</i> | <i>traT</i>         | <i>ompT</i> | <i>chuA</i> | <i>espP, gad, katP</i> | <i>terC</i> | <i>iss</i> | <i>astA, ehxA, stx2c, toxB</i> | <i>espA, espB, espF, espJ, etpD, nleA, nleB, nleC, tccP</i> |
| EF61       | 2              | STEC      | <i>eae, iha, tir</i> | <i>traT</i>         | <i>ompT</i> | <i>chuA</i> | <i>espP, gad, katP</i> | <i>terC</i> | <i>iss</i> | <i>astA, ehxA, stx2c, toxB</i> | <i>espA, espB, espF, espJ, etpD, nleA, nleB, nleC, tccP</i> |
| EM12       | 2              | STEC      | <i>eae, iha, tir</i> | <i>traT</i>         | <i>ompT</i> | <i>chuA</i> | <i>espP, gad, katP</i> | <i>terC</i> | <i>iss</i> | <i>astA, ehxA, stx2c, toxB</i> | <i>espA, espB, espF, espJ, etpD, nleA, nleB, nleC, tccP</i> |
| EM62       | 2              | STEC      | <i>eae, iha, tir</i> | <i>traT</i>         | <i>ompT</i> | <i>chuA</i> | <i>espP, gad, katP</i> | <i>terC</i> | <i>iss</i> | <i>astA, ehxA, stx2c, toxB</i> | <i>espA, espB, espF, espJ, etpD, nleA, nleB, nleC, tccP</i> |
| ES105      | 2              | STEC      | <i>eae, iha, tir</i> | <i>traT</i>         | <i>ompT</i> | <i>chuA</i> | <i>espP, gad, katP</i> | <i>terC</i> | <i>iss</i> | <i>astA, ehxA, stx2c, toxB</i> | <i>espA, espB, espF, espJ, etpD, nleA, nleB, nleC, tccP</i> |
| MB1H       | 3              | STEC      | <i>eae, iha, tir</i> | <i>traT</i>         | <i>ompT</i> | <i>chuA</i> | <i>espP, gad, katP</i> | <i>terC</i> | <i>iss</i> | <i>astA, ehxA, stx2c, toxB</i> | <i>espA, espB, espF, espJ, etpD, nleA, nleB, nleC, tccP</i> |
| MD3H       | 3              | STEC      | <i>eae, iha, tir</i> | <i>traT</i>         | <i>ompT</i> | <i>chuA</i> | <i>espP, gad, katP</i> | <i>terC</i> | <i>iss</i> | <i>astA, ehxA, stx2c, toxB</i> | <i>espA, espB, espF, espJ, etpD, nleA, nleB, nleC, tccP</i> |
| PD2R       | 3              | STEC      | <i>eae, iha, tir</i> | <i>traT</i>         | <i>ompT</i> | <i>chuA</i> | <i>espP, gad, katP</i> | <i>terC</i> | <i>iss</i> | <i>astA, ehxA, stx2c, toxB</i> | <i>espA, espB, espF, espJ, etpD, nleA, nleB, nleC, tccP</i> |
| MB1HI      | 3              | STEC      | <i>eae, iha, tir</i> | <i>traT</i>         | <i>ompT</i> | <i>chuA</i> | <i>espP, gad, katP</i> | <i>terC</i> | <i>iss</i> | <i>astA, ehxA, stx2c, toxB</i> | <i>espA, espB, espF, espJ, etpD, nleA, nleB, nleC, tccP</i> |
| EF19       | 3              | STEC      | <i>eae, iha, tir</i> | <i>traT</i>         | <i>ompT</i> | <i>chuA</i> | <i>espP, gad, katP</i> | <i>terC</i> | <i>iss</i> | <i>astA, ehxA, stx2c, toxB</i> | <i>espA, espB, espF, espJ, etpD, nleA, nleB, nleC, tccP</i> |
| EF21       | 3              | STEC      | <i>eae, iha, tir</i> | <i>traT</i>         | <i>ompT</i> | <i>chuA</i> | <i>espP, gad, katP</i> | <i>terC</i> | <i>iss</i> | <i>astA, ehxA, stx2c, toxB</i> | <i>espA, espB, espF, espJ, etpD, nleA, nleB, nleC, tccP</i> |
| EF34       | 3              | STEC      | <i>eae, iha, tir</i> | <i>traT</i>         | <i>ompT</i> | <i>chuA</i> | <i>espP, gad, katP</i> | <i>terC</i> | <i>iss</i> | <i>astA, ehxA, stx2c, toxB</i> | <i>espA, espB, espF, espJ, etpD, nleA, nleB, nleC, tccP</i> |
| EF38       | 3              | STEC      | <i>eae, iha, tir</i> | <i>traT</i>         | <i>ompT</i> | <i>chuA</i> | <i>espP, gad, katP</i> | <i>terC</i> | <i>iss</i> | <i>astA, ehxA, stx2c, toxB</i> | <i>espA, espB, espF, espJ, etpD, nleA, nleB, nleC, tccP</i> |
| EF41       | 3              | STEC      | <i>eae, iha, tir</i> | <i>traT</i>         | <i>ompT</i> | <i>chuA</i> | <i>espP, gad, katP</i> | <i>terC</i> | <i>iss</i> | <i>astA, ehxA, stx2c, toxB</i> | <i>espA, espB, espF, espJ, etpD, nleA, nleB, nleC, tccP</i> |
| EF43       | 4              | STEC      | <i>eae, iha, tir</i> | <i>traT</i>         | <i>ompT</i> | <i>chuA</i> | <i>espP, gad, katP</i> | <i>terC</i> | <i>iss</i> | <i>astA, ehxA, stx2c, toxB</i> | <i>espA, espB, espF, espJ, etpD, nleA, nleB, nleC, tccP</i> |
| EM114      | 4              | STEC      | <i>eae, iha, tir</i> | <i>traT</i>         | <i>ompT</i> | <i>chuA</i> | <i>espP, gad, katP</i> | <i>terC</i> | <i>iss</i> | <i>astA, ehxA, stx2c, toxB</i> | <i>espA, espB, espF, espJ, etpD, nleA, nleB, nleC, tccP</i> |

|       |   |      |                      |             |             |             |                        |             |            |                                |                                                             |
|-------|---|------|----------------------|-------------|-------------|-------------|------------------------|-------------|------------|--------------------------------|-------------------------------------------------------------|
| ES190 | 4 | STEC | <i>eae, iha, tir</i> | <i>traT</i> | <i>ompT</i> | <i>chuA</i> | <i>espP, gad, katP</i> | <i>terC</i> | <i>iss</i> | <i>astA, ehxA, stx2c, toxB</i> | <i>espA, espB, espF, espJ, etpD, nleA, nleB, nleC, tccP</i> |
| PF2Br | 5 | STEC | <i>eae, iha, tir</i> | <i>traT</i> | <i>ompT</i> | -           | <i>espP, gad, katP</i> | <i>terC</i> | <i>iss</i> | <i>astA, ehxA, stx2a, toxB</i> | <i>espA, espB, espF, espJ, etpD, nleA, nleB, nleC, tccP</i> |
| PA2H  | 5 | STEC | <i>eae, iha, tir</i> | <i>traT</i> | <i>ompT</i> | <i>chuA</i> | <i>espP, gad, katP</i> | <i>terC</i> | <i>iss</i> | <i>astA, ehxA, stx2a, toxB</i> | <i>espA, espB, espF, espJ, etpD, nleA, nleB, nleC, tccP</i> |
| EM34  | 5 | STEC | <i>eae, iha, tir</i> | <i>traT</i> | <i>ompT</i> | <i>chuA</i> | <i>espP, gad, katP</i> | <i>terC</i> | <i>iss</i> | <i>astA, ehxA, stx2a, toxB</i> | <i>espA, espB, espF, espJ, etpD, nleA, nleB, nleC, tccP</i> |
| EM44  | 5 | STEC | <i>eae, iha, tir</i> | <i>traT</i> | <i>ompT</i> | <i>chuA</i> | <i>espP, gad, katP</i> | <i>terC</i> | <i>iss</i> | <i>astA, ehxA, stx2a, toxB</i> | <i>espA, espB, espF, espJ, etpD, nleA, nleB, nleC, tccP</i> |
| ES8   | 5 | STEC | <i>eae, iha, tir</i> | <i>traT</i> | <i>ompT</i> | <i>chuA</i> | <i>espP, gad, katP</i> | <i>terC</i> | <i>iss</i> | <i>astA, ehxA, stx2a, toxB</i> | <i>espA, espB, espF, espJ, etpD, nleA, nleB, nleC, tccP</i> |
| PA2R  | 6 | STEC | <i>eae, iha, tir</i> | <i>traT</i> | <i>ompT</i> | <i>chuA</i> | <i>espP, gad, katP</i> | <i>terC</i> | <i>iss</i> | <i>astA, ehxA, stx2c, toxB</i> | <i>espA, espB, espF, espJ, etpD, nleA, nleB, nleC, tccP</i> |
| PG1Fo | 6 | STEC | <i>eae, iha, tir</i> | <i>traT</i> | <i>ompT</i> | <i>chuA</i> | <i>espP, gad, katP</i> | <i>terC</i> | <i>iss</i> | <i>astA, ehxA, stx2c, toxB</i> | <i>espA, espB, espF, espJ, etpD, nleA, nleB, nleC, tccP</i> |
| PC4R  | 6 | STEC | <i>eae, iha, tir</i> | <i>traT</i> | <i>ompT</i> | <i>chuA</i> | <i>espP, gad, katP</i> | <i>terC</i> | <i>iss</i> | <i>astA, ehxA, stx2c, toxB</i> | <i>espA, espB, espF, espJ, etpD, nleA, nleB, nleC, tccP</i> |
| PC4Br | 6 | STEC | <i>eae, iha, tir</i> | <i>traT</i> | <i>ompT</i> | <i>chuA</i> | <i>espP, gad, katP</i> | <i>terC</i> | <i>iss</i> | <i>astA, ehxA, stx2c, toxB</i> | <i>espA, espB, espF, espJ, etpD, nleA, nleB, nleC, tccP</i> |
| MB5R  |   | STEC | <i>eae, iha, tir</i> | <i>traT</i> | <i>ompT</i> | <i>chuA</i> | <i>espP, gad, katP</i> | <i>terC</i> | <i>iss</i> | <i>astA, ehxA, stx2c, toxB</i> | <i>espA, espB, espF, espJ, etpD, nleA, nleB, nleC, tccP</i> |
| PE1R  |   | STEC | <i>eae, iha, tir</i> | <i>traT</i> | <i>ompT</i> | <i>chuA</i> | <i>espP, gad, katP</i> | <i>terC</i> | <i>iss</i> | <i>astA, ehxA, stx2c, toxB</i> | <i>espA, espB, espF, espJ, etpD, nleA, nleB, nleC, tccP</i> |
