# Supplementary material for: Core Genome Sequencing Analysis of E. coli O157:H7 Unravelling Genetic Relatedness among Strains from Cattle, Beef, and Humans in Bishoftu, Ethiopia
Source: MDPI journal article supplement (doi:10.3390/microbiolres14010013), 2023-01-25
Supplement: s1 [file s1]

**Table S1.** Quality statistics of all *E. coli* isolate genomes sequenced in this study

| Isolate ID | Read quality parameters           |                                    |                            | Length <sup>d</sup> | De novo assembly parameters |                         |                                              |
|------------|-----------------------------------|------------------------------------|----------------------------|---------------------|-----------------------------|-------------------------|----------------------------------------------|
|            | Average read quality <sup>a</sup> | Average read coverage <sup>b</sup> | GC percentage <sup>c</sup> |                     | N50 <sup>e</sup>            | Nr contigs <sup>f</sup> | Average <i>de novo</i> coverage <sup>g</sup> |
| MF3R       | 35,6                              | 434                                | 50,6                       | 5404153             | 212336                      | 215                     | 188                                          |
| MF4HI      | 35,7                              | 352                                | 50,5                       | 5442577             | 212336                      | 218                     | 187                                          |
| EF115      | 35,7                              | 713                                | 50,6                       | 5404545             | 212336                      | 211                     | 188                                          |
| EF3        | 35,7                              | 625                                | 50,6                       | 5405355             | 212336                      | 212                     | 188                                          |
| EF40       | 35,7                              | 490                                | 50,7                       | 5403543             | 212336                      | 215                     | 188                                          |
| EF70       | 35,7                              | 720                                | 50,7                       | 5434420             | 212336                      | 229                     | 187                                          |
| EM68       | 35,7                              | 289                                | 50,8                       | 5402725             | 212336                      | 207                     | 188                                          |
| EM86       | 35,7                              | 704                                | 50,7                       | 5434612             | 212336                      | 231                     | 187                                          |
| ES107      | 35,8                              | 624                                | 51,1                       | 5403648             | 212336                      | 215                     | 179                                          |
| ES18       | 35,7                              | 577                                | 50,6                       | 5432987             | 212336                      | 231                     | 187                                          |
| ES91       | 35,7                              | 488                                | 50,6                       | 5403705             | 212336                      | 218                     | 188                                          |
| EF114      | 35,7                              | 577                                | 50,6                       | 5379215             | 205777                      | 219                     | 189                                          |
| EF123      | 35,7                              | 638                                | 50,6                       | 5375682             | 205777                      | 222                     | 189                                          |
| EF22       | 35,7                              | 536                                | 50,7                       | 5374271             | 205777                      | 211                     | 189                                          |
| EF24       | 35,7                              | 620                                | 50,6                       | 5379348             | 205777                      | 218                     | 189                                          |
| EF25       | 35,7                              | 412                                | 50,6                       | 5376967             | 205777                      | 211                     | 189                                          |
| EF42       | 35,7                              | 648                                | 50,7                       | 5376994             | 212327                      | 218                     | 189                                          |
| EF61       | 35,7                              | 585                                | 50,7                       | 5375140             | 205777                      | 226                     | 189                                          |
| EM12       | 35,7                              | 602                                | 50,7                       | 5375845             | 212327                      | 218                     | 189                                          |
| EM62       | 35,7                              | 613                                | 50,6                       | 5378980             | 205777                      | 221                     | 189                                          |
| ES105      | 35,7                              | 532                                | 50,6                       | 5376589             | 205777                      | 219                     | 189                                          |
| MB1H       | 35,6                              | 379                                | 50,5                       | 5431836             | 212233                      | 215                     | 187                                          |
| MD3H       | 35,6                              | 503                                | 50,7                       | 5401494             | 212233                      | 215                     | 188                                          |
| PD2R       | 35,6                              | 501                                | 50,5                       | 5431149             | 212233                      | 218                     | 187                                          |
| MB1HI      | 35,7                              | 543                                | 50,5                       | 5431980             | 212233                      | 213                     | 187                                          |
| EF19       | 35,7                              | 393                                | 50,6                       | 5401090             | 212233                      | 207                     | 189                                          |
| EF21       | 35,7                              | 633                                | 50,6                       | 5402014             | 212233                      | 216                     | 188                                          |
| EF34       | 35,4                              | 289                                | 50,5                       | 5401854             | 212233                      | 211                     | 188                                          |
| EF38       | 35,7                              | 697                                | 50,6                       | 5401610             | 212233                      | 222                     | 188                                          |
| EF41       | 35,7                              | 667                                | 50,6                       | 5400763             | 212233                      | 210                     | 188                                          |
| EF43       | 35,7                              | 289                                | 50,6                       | 5313933             | 236432                      | 239                     | 191                                          |
| EM114      | 35,7                              | 531                                | 50,7                       | 5314730             | 205778                      | 248                     | 191                                          |
| ES190      | 35,7                              | 423                                | 50,6                       | 5312705             | 205778                      | 240                     | 191                                          |
| PF2Br      | 35,6                              | 489                                | 50,6                       | 5428494             | 149950                      | 226                     | 187                                          |
| PA2H       | 35,7                              | 396                                | 50,6                       | 5435346             | 150153                      | 231                     | 187                                          |
| EM34       | 35,7                              | 289                                | 50,7                       | 5404507             | 150153                      | 231                     | 188                                          |
| EM44       | 35,7                              | 617                                | 50,7                       | 5402857             | 150153                      | 220                     | 188                                          |
| ES8        | 35,7                              | 641                                | 50,6                       | 5404082             | 150103                      | 229                     | 188                                          |
| PA2R       | 35,6                              | 445                                | 50,6                       | 5372178             | 160593                      | 250                     | 189                                          |
| PG1Fo      | 35,6                              | 413                                | 50,7                       | 5344545             | 160593                      | 228                     | 190                                          |
| PC4R       | 35,6                              | 471                                | 50,5                       | 5343527             | 173667                      | 239                     | 190                                          |
| PC4Br      | 35,7                              | 437                                | 50,7                       | 5343841             | 160593                      | 230                     | 190                                          |
| MB5R       | 35,6                              | 477                                | 50,5                       | 5352210             | 160594                      | 223                     | 190                                          |
| PE1R       | 35,7                              | 522                                | 50,6                       | 5363855             | 205777                      | 219                     | 190                                          |

<sup>a</sup> The average read quality should be > 30; <sup>b</sup> the expected coverage for each base should be above 30; <sup>c</sup> the GC percentage should be  $\pm 50\%$ ; <sup>d</sup> the length of the assembled sequence should be between 3.9 Mb and 6.5 Mb; <sup>e</sup> the length of the median contig should be above > 52100; <sup>f</sup> the number of contigs in the assemble sequence should be <450; <sup>g</sup> the average *de novo* coverage should be > 30.
