# Supplementary material for: Core Genome Sequencing Analysis of E. coli O157:H7 Unravelling Genetic Relatedness among Strains from Cattle, Beef, and Humans in Bishoftu, Ethiopia
Source: MDPI journal article supplement (doi:10.3390/microbiolres14010013), 2023-01-25
Supplement: s1 [file s1]

**Table S3.** Hierarchical clustering of core genome multilocus sequence typing (cgMLST) (HierCC) results obtained from EnteroBase for all *E. coli* isolate genomes, with indication of the cgMLST clusters obtained from BioNumerics

| Isolate ID | EnteroBase barcode | CgMLST cluster | HC0 <sup>1</sup> | HC2    | HC5    | HC10   | HC20   | HC50   | HC100 | HC200 <sup>2</sup> |
|------------|--------------------|----------------|------------------|--------|--------|--------|--------|--------|-------|--------------------|
| MF3R       | ESC_CB5267AA       | 1              | 205870           | 205870 | 205870 | 205870 | 205870 | 205870 | 37630 | 63                 |
| MF4HI      | ESC_CB5322AA       | 1              | 205870           | 205870 | 205870 | 205870 | 205870 | 205870 | 37630 | 63                 |
| EF115      | ESC_CB5344AA       | 1              | 205870           | 205870 | 205870 | 205870 | 205870 | 205870 | 37630 | 63                 |
| EF3        | ESC_AB5360AA       | 1              | 205870           | 205870 | 205870 | 205870 | 205870 | 205870 | 37630 | 63                 |
| EF40       | ESC_AB5384AA       | 1              | 205870           | 205870 | 205870 | 205870 | 205870 | 205870 | 37630 | 63                 |
| EF70       | ESC_CB5354AA       | 1              | 205870           | 205870 | 205870 | 205870 | 205870 | 205870 | 37630 | 63                 |
| EM68       | ESC_CB5369AA       | 1              | 205870           | 205870 | 205870 | 205870 | 205870 | 205870 | 37630 | 63                 |
| EM86       | ESC_CB5326AA       | 1              | 220708           | 205870 | 205870 | 205870 | 205870 | 205870 | 37630 | 63                 |
| ES107      | ESC_CB5370AA       | 1              | 205870           | 205870 | 205870 | 205870 | 205870 | 205870 | 37630 | 63                 |
| ES18       | ESC_CB5325AA       | 1              | 220705           | 205870 | 205870 | 205870 | 205870 | 205870 | 37630 | 63                 |
| ES91       | ESC_CB5368AA       | 1              | 220732           | 205870 | 205870 | 205870 | 205870 | 205870 | 37630 | 63                 |
| EF114      | ESC_CB5361AA       | 2              | 220729           | 205871 | 205871 | 205871 | 205871 | 205871 | 30437 | 63                 |
| EF123      | ESC_CB5362AA       | 2              | 220720           | 205871 | 205871 | 205871 | 205871 | 205871 | 30437 | 63                 |
| EF22       | ESC_AB5359AA       | 2              | 205871           | 205871 | 205871 | 205871 | 205871 | 205871 | 30437 | 63                 |
| EF24       | ESC_AB5385AA       | 2              | 205871           | 205871 | 205871 | 205871 | 205871 | 205871 | 30437 | 63                 |
| EF25       | ESC_BB5386AA       | 2              | 205871           | 205871 | 205871 | 205871 | 205871 | 205871 | 30437 | 63                 |
| EF42       | ESC_CB5363AA       | 2              | 205871           | 205871 | 205871 | 205871 | 205871 | 205871 | 30437 | 63                 |
| EF61       | ESC_CB5343AA       | 2              | 220720           | 205871 | 205871 | 205871 | 205871 | 205871 | 30437 | 63                 |
| EM12       | ESC_CB5341AA       | 2              | 220724           | 205871 | 205871 | 205871 | 205871 | 205871 | 30437 | 63                 |
| EM62       | ESC_CB5342AA       | 2              | 205871           | 205871 | 205871 | 205871 | 205871 | 205871 | 30437 | 63                 |
| ES105      | ESC_CB5367AA       | 2              | 220720           | 205871 | 205871 | 205871 | 205871 | 205871 | 30437 | 63                 |
| MB1H       | ESC_CB5335AA       | 3              | 220715           | 205844 | 205844 | 205844 | 205844 | 205844 | 16335 | 63                 |
| MD3H       | ESC_CB5351AA       | 3              | 220680           | 205844 | 205844 | 205844 | 205844 | 205844 | 16335 | 63                 |
| PD2R       | ESC_CB5269AA       | 3              | 220680           | 205844 | 205844 | 205844 | 205844 | 205844 | 16335 | 63                 |
| MB1HI      | ESC_CB5358AA       | 3              | 220680           | 205844 | 205844 | 205844 | 205844 | 205844 | 16335 | 63                 |
| EF19       | ESC_AB5354AA       | 3              | 205844           | 205844 | 205844 | 205844 | 205844 | 205844 | 16335 | 63                 |
| EF21       | ESC_CB5353AA       | 3              | 205844           | 205844 | 205844 | 205844 | 205844 | 205844 | 16335 | 63                 |
| EF34       | ESC_CB5364AA       | 3              | 220730           | 205844 | 205844 | 205844 | 205844 | 205844 | 16335 | 63                 |
| EF38       | ESC_CB5365AA       | 3              | 220730           | 205844 | 205844 | 205844 | 205844 | 205844 | 16335 | 63                 |
| EF41       | ESC_CB5360AA       | 3              | 205844           | 205844 | 205844 | 205844 | 205844 | 205844 | 16335 | 63                 |
| EF43       | ESC_AB5353AA       | 4              | 205843           | 205843 | 205843 | 205843 | 205843 | 205843 | 30437 | 63                 |
| EM114      | ESC_CB5352AA       | 4              | 220728           | 205843 | 205843 | 205843 | 205843 | 205843 | 30437 | 63                 |
| ES190      | ESC_CB5266AA       | 4              | 220681           | 205843 | 205843 | 205843 | 205843 | 205843 | 30437 | 63                 |
| PF2Br      | ESC_CB5334AA       | 5              | 220712           | 147247 | 147247 | 147247 | 147247 | 15671  | 1022  | 63                 |
| PA2H       | ESC_CB5336AA       | 5              | 147247           | 147247 | 147247 | 147247 | 147247 | 15671  | 1022  | 63                 |
| EM34       | ESC_BB5385AA       | 5              | 147247           | 147247 | 147247 | 147247 | 147247 | 15671  | 1022  | 63                 |
| EM44       | ESC_CB5359AA       | 5              | 205848           | 147247 | 147247 | 147247 | 147247 | 15671  | 1022  | 63                 |
| ES8        | ESC_AB5358AA       | 5              | 205848           | 147247 | 147247 | 147247 | 147247 | 15671  | 1022  | 63                 |
| PA2R       | ESC_AB5355AA       | 6              | 205845           | 205845 | 205845 | 205845 | 205845 | 205845 | 30437 | 63                 |
| PG1Fo      | ESC_CB5357AA       | 6              | 220682           | 205845 | 205845 | 205845 | 205845 | 205845 | 30437 | 63                 |
| PC4R       | ESC_CB5337AA       | 6              | 205845           | 205845 | 205845 | 205845 | 205845 | 205845 | 30437 | 63                 |
| PC4Br      | ESC_CB5268AA       | 6              | 220682           | 205845 | 205845 | 205845 | 205845 | 205845 | 30437 | 63                 |
| MB5R       | ESC_AB5355AA       |                | 205847           | 205847 | 205847 | 205847 | 205847 | 205847 | 30437 | 63                 |
| PE1R       | ESC_AB5357AA       |                | 205846           | 205846 | 205846 | 205844 | 205844 | 205844 | 16335 | 63                 |

<sup>1</sup> HC0: hierarchical clusters (HCs) with identical genomes with no allele difference.

<sup>2</sup> HC200: HC with genomes up to 200 allele differences.
