# Supplementary material for: Core Genome Sequencing Analysis of E. coli O157:H7 Unravelling Genetic Relatedness among Strains from Cattle, Beef, and Humans in Bishoftu, Ethiopia
Source: MDPI journal article supplement (doi:10.3390/microbiolres14010013), 2023-01-25
Supplement: s1 [file s1]

**Table S2.** Relevant microbiological and host-associated information of all *E. coli* isolates included in our study.

| Isolate ID         | CgMLST cluster | PFGE pulsotype [this study] | PFGE pulsotype [18] | PFGE pulsotype [19] | Pathotype | Stx subtype | Sampling date | Origin | Sample type      | Slaughterhouse |
|--------------------|----------------|-----------------------------|---------------------|---------------------|-----------|-------------|---------------|--------|------------------|----------------|
| MF3R               | 1              | VI                          | -                   | B                   | aEPEC     | -           | 6-Feb-2019    | Cattle | Rectal content   | Municipal      |
| MF4HI              | 1              | VI                          | -                   | B                   | aEPEC     | -           | 6-Feb-2019    | Cattle | Carcass hind leg | Municipal      |
| EF115              | 1              | VI                          | D                   | -                   | aEPEC     | -           | 15-Sep-2017   | Cattle | Rectal content   | Municipal      |
| EF3                | 1              | VI                          | D                   | -                   | aEPEC     | -           | 23-Jun-2017   | Cattle | Rectal content   | Municipal      |
| EF40               | 1              | VI                          | D                   | -                   | aEPEC     | -           | 21-Jul-2017   | Cattle | Rectal content   | Municipal      |
| EF70               | 1              | VII                         | E                   | -                   | STEC      | stx2c+      | 11-Aug-2017   | Cattle | Rectal content   | Municipal      |
| EM68               | 1              | VI                          | D                   | -                   | aEPEC     | -           | 20-Apr-2018   | Cattle | Beef             | -              |
| EM86               | 1              | VII                         | E                   | -                   | STEC      | stx2c+      | 4-May-2018    | Cattle | Beef             | -              |
| ES107              | 1              | VI                          | D                   | -                   | aEPEC     | -           | 14-May-2018   | Human  | Stool            | -              |
| ES18               | 1              | VII                         | E                   | -                   | STEC      | stx2c+      | 15-Jan-2018   | Human  | Stool            | -              |
| ES91               | 1              | VI                          | D                   | -                   | aEPEC     | -           | 5-Feb-2018    | Human  | Stool            | -              |
| EF114              | 2              | XI                          | F                   | -                   | STEC      | stx2c+      | 15-Sep-2017   | Cattle | Rectal content   | Municipal      |
| EF123              | 2              | XI                          | F                   | -                   | STEC      | stx2c+      | 6-Oct-2017    | Cattle | Rectal content   | Private        |
| EF22               | 2              | XI                          | F                   | -                   | STEC      | stx2c+      | 9-Jul-2017    | Cattle | Rectal content   | Municipal      |
| EF24               | 2              | XI                          | F                   | -                   | STEC      | stx2c+      | 14-Jul-2017   | Cattle | Rectal content   | Municipal      |
| EF25               | 2              | XI                          | F                   | -                   | STEC      | stx2c+      | 14-Jul-2017   | Cattle | Rectal content   | Municipal      |
| EF42               | 2              | XI                          | F                   | -                   | STEC      | stx2c+      | 21-Jul-2017   | Cattle | Rectal content   | Municipal      |
| EF61               | 2              | XI                          | F                   | -                   | STEC      | stx2c+      | 4-Aug-2017    | Cattle | Rectal content   | Municipal      |
| EM12               | 2              | XI                          | F                   | -                   | STEC      | stx2c+      | 19-Jan-2018   | Cattle | Beef             | -              |
| EM62               | 2              | XI                          | F                   | -                   | STEC      | stx2c+      | 20-Apr-2018   | Cattle | Beef             | -              |
| ES105              | 2              | XI                          | F                   | -                   | STEC      | stx2c+      | 14-May-2018   | Human  | Stool            | -              |
| MB1H <sup>a</sup>  | 3              | VIII                        | -                   | C                   | STEC      | stx2c+      | 21-Nov-2018   | Cattle | Hide             | Municipal      |
| MD3H               | 3              | VIII                        | -                   | C                   | STEC      | stx2c+      | 5-Dec-2018    | Cattle | Hide             | Municipal      |
| PD2R               | 3              | V                           | -                   | A                   | STEC      | stx2c+      | 9-Jan-2019    | Cattle | Rectal content   | Private        |
| MB1HI <sup>a</sup> | 3              | VIII                        | -                   | C                   | STEC      | stx2c+      | 21-Nov-2018   | Cattle | Carcass hind leg | Municipal      |
| EF19               | 3              | VIII                        | C                   | -                   | STEC      | stx2c+      | 7-Jul-2017    | Cattle | Rectal content   | Municipal      |
| EF21               | 3              | VIII                        | C                   | -                   | STEC      | stx2c+      | 8-Jul-2017    | Cattle | Rectal content   | Municipal      |
| EF34               | 3              | VIII                        | C                   | -                   | STEC      | stx2c+      | 21-Jul-2017   | Cattle | Rectal content   | Municipal      |
| EF38               | 3              | VIII                        | C                   | -                   | STEC      | stx2c+      | 21-Jul-2017   | Cattle | Rectal content   | Municipal      |

|                    |   |      |   |   |      |        |             |        |                 |           |
|--------------------|---|------|---|---|------|--------|-------------|--------|-----------------|-----------|
| EF41               | 3 | VIII | C | - | STEC | stx2c+ | 21-Jul-2017 | Cattle | Rectal content  | Municipal |
| EF43               | 4 | X    | B | - | STEC | stx2c+ | 21-Jul-2017 | Cattle | Rectal content  | Municipal |
| EM114              | 4 | IX   | A | - | STEC | stx2c+ | 25-May-2018 | Cattle | Beef            | -         |
| ES190              | 4 | IX   | A | - | STEC | stx2c+ | 25-Jun-2018 | Human  | Stool           | -         |
| PF2Br              | 5 | XIV  | - | I | STEC | stx2a+ | 23-Jan-2019 | Cattle | Carcass brisket | Private   |
| PA2H <sup>c</sup>  | 5 | XIV  | - | I | STEC | stx2a+ | 19-Dec-2018 | Cattle | Hide            | Private   |
| EM34               | 5 | XII  | G | - | STEC | stx2a+ | 2-Feb-2018  | Cattle | Beef            | -         |
| EM44               | 5 | XII  | G | - | STEC | stx2a+ | 6-Apr-2018  | Cattle | Beef            | -         |
| ES8                | 5 | XIII | H | - | STEC | stx2a+ | 8-Jan-2018  | Human  | Stool           | -         |
| PA2R <sup>c</sup>  | 6 | I    | - | E | STEC | stx2c+ | 19-Dec-2018 | Cattle | Rectal content  | Private   |
| PG1Fo              | 6 | II   | - | F | STEC | stx2c+ | 30-Jan-2019 | Cattle | Carcass foreleg | Private   |
| PC4R <sup>b</sup>  | 6 | III  | - | G | STEC | stx2c+ | 2-Jan-2019  | Cattle | Rectal content  | Private   |
| PC4Br <sup>b</sup> | 6 | IV   | - | H | STEC | stx2c+ | 2-Jan-2019  | Cattle | Carcass brisket | Private   |
| MB5R               |   | XV   | - | D | STEC | stx2c+ | 21-Nov-2018 | Cattle | Rectal content  | Municipal |
| PE1R               |   | VIII | - | C | STEC | stx2c+ | 16-Jan-2019 | Cattle | Rectal content  | Private   |

<sup>a, b, c</sup> Isolates from a same animal.

#### References

18. Gutema, F.D.; Rasschaert, G.; Agga, G.E.; Jufare, A.; Duguma, A.B.; Abdi, R.D.; Duchateau, L.; Crombe, F.; Gabriel, S.; De Zutter, L. Occurrence, Molecular Characteristics, and Antimicrobial Resistance of *Escherichia coli* O157 in Cattle, Beef, and Humans in Bishoftu Town, Central Ethiopia. *Foodborne Pathogens and Disease* **2021**, *18*, 1-7, doi:10.1089/fpd.2020.2830.
19. Gutema, F.D.; Abdi, R.D.; Agga, G.E.; Firew, S.; Rasschaert, G.; Mattheus, W.; Crombe, F.; Duchateau, L.; Gabriël, S.; De Zutter, L. Assessment of beef carcass contamination with *Salmonella* and *E. coli* O157 in slaughterhouses in Bishoftu, Ethiopia. *International Journal of Food Contamination* **2021**, *8* (1), 1-9, doi:10.1186/s40550-021-00082-1.
